# Supplementary material
Source: publisher figshare collection journal article supplement (https://frontiersin.figshare.com/ndownloader/files/24496505)
Supplement: Supplementary file [file 24496505]

**Table 1.** Search Strategy

|         |                                                                                                                                                                                                                                                                                                                                                                                                                                                                                                                                                                                                                                                                                                                                                                                                                                                                                                                    |
|---------|--------------------------------------------------------------------------------------------------------------------------------------------------------------------------------------------------------------------------------------------------------------------------------------------------------------------------------------------------------------------------------------------------------------------------------------------------------------------------------------------------------------------------------------------------------------------------------------------------------------------------------------------------------------------------------------------------------------------------------------------------------------------------------------------------------------------------------------------------------------------------------------------------------------------|
| MEDLINE | 1 exp Analgesics, Opioid/<br>2 (opiate* or opioid* or fentanyl or<br>narcotic* or dilaudid or oxycontin* or<br>oxycod*).ti,ab.<br>3 1 or 2<br>4 exp Drug Prescriptions/<br>5 (prescript* or prescrib* or<br>pharmaceutical* or legal*).ti,ab.<br>6 4 or 5<br>7 3 and 6<br>8 ((prescript* or prescrib* or<br>pharmaceutical*) adj2 (opioid* or opiate*<br>or dilaudid or fentanyl or codeine or<br>oxyco*)).ti,ab.<br>9 7 or 8<br>10 Opioid-Related Disorders/<br>11 Heroin Dependence/<br>12 Substance-Related Disorders/<br>13 Substance Abuse, Intravenous/<br>14 ((opiate* or opioid* or heroin* or<br>oxyco* or codeine* or dilaudid or fentanyl<br>or drug* or substance*) adj2 (use* or using<br>or misuse* or abus* or dependence* or<br>dependent* or addict*)).ti,ab.<br>15 10 or 11 or 12 or 13 or 14<br>16 9 and 15<br>17 exp animals/ not (humans/ and exp<br>animals/)<br>18 16 not 17<br>19 9 and 15 |
| EMBASE  | 1 exp heroin dependence/<br>2 opiate/<br>3 exp opiate addiction/<br>4 substance abuse/<br>5 ((opiate* or opioid* or heroin* or<br>oxyco* or codeine* or dilaudid or fentanyl<br>or drug* or substance*) adj2 (use* or using<br>or misuse* or abus* or dependence* or<br>dependent* or addict*)).ti,ab.<br>6 1 or 2 or 3 or 4 or 5<br>7 ((prescript* or prescrib* or<br>pharmaceutical*) adj2 (opioid* or opiate*                                                                                                                                                                                                                                                                                                                                                                                                                                                                                                   |

|          |                                                                                                                                                                                                                                                                                                                                                                                                                                                                                                                                                                                                                                                                                                                                                                                   |
|----------|-----------------------------------------------------------------------------------------------------------------------------------------------------------------------------------------------------------------------------------------------------------------------------------------------------------------------------------------------------------------------------------------------------------------------------------------------------------------------------------------------------------------------------------------------------------------------------------------------------------------------------------------------------------------------------------------------------------------------------------------------------------------------------------|
|          | <p>or dilaudid or fentanyl or codeine or oxyco*)).ti,ab.</p> <p>8 (prescript* or prescrib* or pharmaceutical* or legal*).ti,ab.</p> <p>9 exp prescription/</p> <p>10 exp prescription drug/</p> <p>11 (opiate* or opioid* or fentanyl or narcotic* or dilaudid or oxycontin* or oxycod*).ti,ab.</p> <p>12 exp narcotic analgesic agent/</p> <p>13 11 or 12</p> <p>14 8 or 9 or 10</p> <p>15 13 and 14</p> <p>16 7 or 15</p> <p>17 6 and 16</p> <p>18 limit 17 to human</p>                                                                                                                                                                                                                                                                                                        |
| PsycINFO | <p>1 exp Opiates/</p> <p>2 (opiate* or opioid* or fentanyl or narcotic* or dilaudid or oxycontin* or oxycod*).ti,ab.</p> <p>3 exp Prescription Drugs/</p> <p>4 1 or 2</p> <p>5 (prescript* or prescrib* or pharmaceutical* or legal*).ti,ab.</p> <p>6 3 or 5</p> <p>7 4 and 6</p> <p>8 ((prescript* or prescrib* or pharmaceutical*) adj2 (opioid* or opiate* or dilaudid or fentanyl or codeine or oxyco*)).ti,ab.</p> <p>9 7 or 8</p> <p>10 exp Heroin Addiction/ or exp Heroin/</p> <p>11 exp Intravenous Drug Usage/</p> <p>12 ((opiate* or oxyco* or opioid* or heroin* or codeine* or dilaudid or fentanyl or drug* or substance*) adj2 (use* or using or misuse* or abus* or dependence* or dependent* or addict*)).ti,ab.</p> <p>13 10 or 11 or 12</p> <p>14 9 and 13</p> |
|          | <p>1 (MH "Drugs, Non-Prescription") OR (MH "Drugs, Prescription") OR (MH "Prescriptions, Drug") OR (MH "Drugs, Off-Label")</p>                                                                                                                                                                                                                                                                                                                                                                                                                                                                                                                                                                                                                                                    |

|        |                                                                                                                                                                                                                                                                                                                                                                                                                                                                                                                                                                                                                                                                                                                                                                                                                 |
|--------|-----------------------------------------------------------------------------------------------------------------------------------------------------------------------------------------------------------------------------------------------------------------------------------------------------------------------------------------------------------------------------------------------------------------------------------------------------------------------------------------------------------------------------------------------------------------------------------------------------------------------------------------------------------------------------------------------------------------------------------------------------------------------------------------------------------------|
| CINAHL | <p>2 (MH "Substance Use Disorders")</p> <p>3 (MH "Heroin") OR (MH "Substance Dependence")</p> <p>4 (MH "Substance Abuse, Intravenous")</p> <p>5 ((opiate* or opioid* or oxyco* or heroin* or codeine* or dilaudid or fentanyl or drug* or substance*) N2 (use* or using or misuse* or abus* or dependence* or dependent* or addict*))</p> <p>6 (MH "Analgesics, Opioid")</p> <p>7 (opiate* or opioid* or fentanyl or narcotic* or dilaudid or oxycontin* or oxycod*)</p> <p>8 2 OR 3 OR 4 OR 5</p> <p>9 ((prescript* or prescrib* or pharmaceutical*) n2 (opioid* or opiate* or dilaudid or fentanyl or codeine or oxyco*))</p> <p>10 6 OR 7</p> <p>11 (prescript* or prescrib* or pharmaceutical* or legal*)</p> <p>12 1 OR 11</p> <p>13 12 AND 13</p> <p>14 9 OR 14</p> <p>15 8 AND 15 ( limiters- human)</p> |
|--------|-----------------------------------------------------------------------------------------------------------------------------------------------------------------------------------------------------------------------------------------------------------------------------------------------------------------------------------------------------------------------------------------------------------------------------------------------------------------------------------------------------------------------------------------------------------------------------------------------------------------------------------------------------------------------------------------------------------------------------------------------------------------------------------------------------------------|

**Cooper 2018**

| Study Identification                            | Author Judgment      | Justification                                                                                                             |
|-------------------------------------------------|----------------------|---------------------------------------------------------------------------------------------------------------------------|
| Appropriate Source Population                   | Low risk             | Consecutive sample from a population representative of the condition under study                                          |
| Sufficient Power/Sample Size                    | Low Risk             | Modest sample size (N = 108)                                                                                              |
| Adjust for Confounders or Other Variables       | Low Risk             | Covariates included age, gender and other variables significant at the bivariate level.                                   |
| Appropriate Statistical Analyses                | Low Risk             | Reported use of appropriate statistical analysis as required                                                              |
| Incomplete Outcome Data                         | Low to Moderate Risk | Multiple imputation with fully conditional specification to impute missing item-level data to maintain power for analysis |
| Outcome Measurement                             | Low Risk             | Provided a detailed description of the outcome measures which are appropriate for the outcome of interest                 |
| Objective assessment of the outcome of interest | Low to Moderate Risk | Relied on self-report as the primary method to discern outcome status                                                     |

**Sanger 2018**

| Study Identification                      | Author Judgment | Justification                                                                    |
|-------------------------------------------|-----------------|----------------------------------------------------------------------------------|
| Appropriate Source Population             | Low Risk        | Consecutive sample from a population representative of the condition under study |
| Sufficient Power/Sample Size              | Low Risk        | Large sample size (N = 976)                                                      |
| Adjust for Confounders or Other Variables | Low Risk        | Covariates included age, sex, methadone dose, treatment duration among others    |
| Appropriate Statistical Analyses          | Low Risk        | Reported use of appropriate statistical analysis as required                     |

|                                                 |                      |                                                                                                           |
|-------------------------------------------------|----------------------|-----------------------------------------------------------------------------------------------------------|
| Incomplete Outcome Data                         | Low Risk             | Participants missing data were not included in analysis                                                   |
| Outcome Measurement                             | Low Risk             | Provided a detailed description of the outcome measures which are appropriate for the outcome of interest |
| Objective assessment of the outcome of interest | Low to Moderate Risk | Relied on self-report as the primary method to discern outcome status                                     |

### Canfield 2010

| Study Identification                            | Author Judgment      | Justification                                                                                             |
|-------------------------------------------------|----------------------|-----------------------------------------------------------------------------------------------------------|
| Appropriate Source Population                   | Low Risk             | Consecutive sample from a population representative of the condition under study                          |
| Sufficient Power/Sample Size                    | Low Risk             | Small sample size (N = 75); provided power analysis                                                       |
| Adjust for Confounders or Other Variables       | High Risk            | Did not adjust for confounders; performed student t-tests                                                 |
| Appropriate Statistical Analyses                | Low Risk             | Reported use of appropriate statistical analysis as required                                              |
| Incomplete Outcome Data                         | Unclear Risk         | No information provided                                                                                   |
| Outcome Measurement                             | Low Risk             | Provided a detailed description of the outcome measures which are appropriate for the outcome of interest |
| Objective assessment of the outcome of interest | Low to Moderate Risk | Relied on self-report as the primary method to discern outcome status                                     |

### Tsui 2010

| Study Identification | Author Judgment | Justification |
|----------------------|-----------------|---------------|
|----------------------|-----------------|---------------|

|                                                 |                      |                                                                                                                                 |
|-------------------------------------------------|----------------------|---------------------------------------------------------------------------------------------------------------------------------|
| Appropriate Source Population                   | Low Risk             | Consecutive sample from a population representative of the condition under study                                                |
| Sufficient Power/Sample Size                    | Low Risk             | Modest sample size (N = 140)                                                                                                    |
| Adjust for Confounders or Other Variables       | Low Risk             | Covariates included sociodemographics, depression, pain, current and prior substance use.                                       |
| Appropriate Statistical Analyses                | Low Risk             | Reported use of appropriate statistical analysis as required                                                                    |
| Incomplete Outcome Data                         | Low Risk             | Missing data on the question which asked whether a physician had introduced them to opiates and were excluded from the analyses |
| Outcome Measurement                             | Low Risk             | Provided a detailed description of the outcome measures which are appropriate for the outcome of interest                       |
| Objective assessment of the outcome of interest | Low to Moderate Risk | Relied on self-report as the primary method to discern outcome status                                                           |

### **Dreifuss 2013**

| Study Identification                      | Author Judgment | Justification                                                                    |
|-------------------------------------------|-----------------|----------------------------------------------------------------------------------|
| Appropriate Source Population             | Low Risk        | Consecutive sample from a population representative of the condition under study |
| Sufficient Power/Sample Size              | Low Risk        | Large sample size (N = 360)                                                      |
| Adjust for Confounders or Other Variables | Unclear Risk    | Unclear Information Provided                                                     |
| Appropriate Statistical Analyses          | Low Risk        | Reported use of appropriate statistical analysis as required                     |
| Incomplete Outcome Data                   | Unclear Risk    | No information provided                                                          |

|                                                 |                      |                                                                                                           |
|-------------------------------------------------|----------------------|-----------------------------------------------------------------------------------------------------------|
| Outcome Measurement                             | Low Risk             | Provided a detailed description of the outcome measures which are appropriate for the outcome of interest |
| Objective assessment of the outcome of interest | Low to Moderate Risk | Relied on self-report as the primary method to discern outcome status                                     |
